# Supplementary material
Source: MDPI journal article supplement (https://www.mdpi.com/2073-4395/8/4/55)
Supplement: s1 [file s1]

**Supplementary Material**

**Table S1.** Marker code, primer sequences, repeat unit, and annealing temperature of the six OPUNTIA and the nine OPUFIC primers used in this study.

| Marker | Primer sequences 5´- 3´ | Repeat unit | Annealing temp. (ºC) |
| --- | --- | --- | --- |
| OA3 a | F: gtg agt gcc cag atg aaa ct | (AG)19 | 56 |
| R: tcc tca act tta ttg tag caa gag |
| OA5 a | F: tat gca caa agc acc atg c | (TA)5 | 57 |
| R: cca acc ata cca act gta ctg ac |
| OA9 a | F: cta ggc ttc atc cca cat tag g | (AG)15 | 56 |
| R: tcc aaa ttc acc tcc tct gc |
| OA11 a | F: cct aca cct gct gcc aat c | (CT)13TT(CT)2 | 56 |
| R: cga gac aaa cat cag agg ag |
| OA12 a | F: taa tct tat tct cag gtc agt tac | (TC)4C(TC)12 | 56 |
| R: ggt atc ttg tta ttc gtt cg |
| OA13 a | F: cca aat acc cag ccc ata c | (AG)12 | 57 |
| R: cga gaa cct aac ttc cga tg |
| OC1 b | F: tgg gtg aga caa tat agt aga cca ag | (CT)16 | 52 |
| R: ctg ccg tga aat ctg aat gg |
| OC3 b | F: gct ttg aaa tgt ctt gtg tga atg | (TG)12 | 52 |
| R: agt cct ggg aat cct caa cc |
| OC4 b | F: tgc agt cag gtt tct cat tgt c | (TG)12 | 52 |
| R: gcc caa ctc tta ccc tct cc |
| OC9 b | F: ggc aat acc ctg agt tga gc | (AAG)16 | 57 |
| R: cct gag act aca gcg tga gga |
| OC10 b | F: gct tcc ttc aat agc atg acc | (GT)12 | 55 |
| R: tga ggc ttt aca tgg cac ac |
| OC13 b | F: ggg ctt tca acg atg ctg | (TC)12(AC)11 | 55 |
| R: aag aca tag gtt gga gac tca att c |
| OC14 b | F: aat tga cct ctt cac gtt atg c | (CTT)7(CTT)10 | 58 |
| R: gag aaa gtg agg cag aca acg |
| OC15 b | F: tta aac ctg cac acc att cg | (CT)22 | 56 |
| R: gtg tga ggc gag gtt gct c |
| OC17 b | F: atg gat cgt ctt cgt cct tg | (AG)13 | 55 |
| R: gat gtc acc cca ttc cat tc |

a OPUNTIA set of primers accordingHelsen et al. [13], b OPUFIC set of primers according Erre et al. [14].

**Table S2.** Dice similarity coefficient for *Opuntia* spp. populations.

| OFI01 | OFI03 | OFI04 | OFI05 | Bianca | Gialla | OFI08 | OFI09 | *O. dillenii* | OFI11 | OFI12 | OFI13 | OFI14 | OFI15 | OFI16 | OFI17 | OFI18 | OFI19 | OFI20 | *O. elata* | Rossa | *O. robusta* |  |
| --- | --- | --- | --- | --- | --- | --- | --- | --- | --- | --- | --- | --- | --- | --- | --- | --- | --- | --- | --- | --- | --- | --- |
| 1.000 |  |  |  |  |  |  |  |  |  |  |  |  |  |  |  |  |  |  |  |  |  | OFI01 |
| 1.000 | 1.000 |  |  |  |  |  |  |  |  |  |  |  |  |  |  |  |  |  |  |  |  | OFI03 |
| 0.708 | 0.708 | 1.000 |  |  |  |  |  |  |  |  |  |  |  |  |  |  |  |  |  |  |  | OFI04 |
| 0.708 | 0.708 | 1.000 | 1.000 |  |  |  |  |  |  |  |  |  |  |  |  |  |  |  |  |  |  | OFI05 |
| 1.000 | 1.000 | 0.708 | 0.708 | 1.000 |  |  |  |  |  |  |  |  |  |  |  |  |  |  |  |  |  | Bianca |
| 0.708 | 0.708 | 1.000 | 1.000 | 0.708 | 1.000 |  |  |  |  |  |  |  |  |  |  |  |  |  |  |  |  | Gialla |
| 1.000 | 1.000 | 0.708 | 0.708 | 1.000 | 0.708 | 1.000 |  |  |  |  |  |  |  |  |  |  |  |  |  |  |  | OFI08 |
| 1.000 | 1.000 | 0.708 | 0.708 | 1.000 | 0.708 | 1.000 | 1.000 |  |  |  |  |  |  |  |  |  |  |  |  |  |  | OFI09 |
| 0.381 | 0.381 | 0.368 | 0.368 | 0.381 | 0.368 | 0.381 | 0.381 | 1.000 |  |  |  |  |  |  |  |  |  |  |  |  |  | *O. dillenii* |
| 1.000 | 1.000 | 0.708 | 0.708 | 1.000 | 0.708 | 0.708 | 1.000 | 0.381 | 1.000 |  |  |  |  |  |  |  |  |  |  |  |  | OFI11 |
| 0.708 | 0.708 | 1.000 | 1.000 | 0.708 | 1.000 | 0.708 | 0.708 | 0.368 | 0.708 | 1.000 |  |  |  |  |  |  |  |  |  |  |  | OFI12 |
| 0.708 | 0.708 | 1.000 | 1.000 | 0.708 | 1.000 | 0.708 | 0.708 | 0.368 | 0.708 | 1.000 | 1.000 |  |  |  |  |  |  |  |  |  |  | OFI13 |
| 0.708 | 0.708 | 1.000 | 1.000 | 0.708 | 1.000 | 0.708 | 0.708 | 0.368 | 0.708 | 1.000 | 1.000 | 1.000 |  |  |  |  |  |  |  |  |  | OFI14 |
| 1.000 | 1.000 | 0.708 | 0.708 | 1.000 | 0.708 | 1.000 | 1.000 | 0.381 | 1.000 | 0.708 | 0.708 | 0.708 | 1.000 |  |  |  |  |  |  |  |  | OFI15 |
| 1.000 | 1.000 | 0.708 | 0.708 | 1.000 | 0.708 | 1.000 | 1.000 | 0.381 | 1.000 | 0.708 | 0.708 | 0.708 | 1.000 | 1.000 |  |  |  |  |  |  |  | OFI16 |
| 1.000 | 1.000 | 0.708 | 0.708 | 1.000 | 0.708 | 1.000 | 1.000 | 0.381 | 1.000 | 0.708 | 0.708 | 0.708 | 1.000 | 1.000 | 1.000 |  |  |  |  |  |  | OFI17 |
| 1.000 | 1.000 | 0.708 | 0.708 | 1.000 | 0.708 | 1.000 | 1.000 | 0.381 | 1.000 | 0.708 | 0.708 | 0.708 | 1.000 | 1.000 | 1.000 | 1.000 |  |  |  |  |  | OFI18 |
| 1.000 | 1.000 | 0.708 | 0.708 | 1.000 | 0.708 | 1.000 | 1.000 | 0.381 | 1.000 | 0.708 | 0.708 | 0.708 | 1.000 | 1.000 | 1.000 | 1.000 | 1.000 |  |  |  |  | OFI19 |
| 0.708 | 0.708 | 1.000 | 1.000 | 0.708 | 1.000 | 0.708 | 0.708 | 0.368 | 0.708 | 1.000 | 1.000 | 1.000 | 0.708 | 0.708 | 0.708 | 0.708 | 0.708 | 1.000 |  |  |  | OFI20 |
| 0.255 | 0.255 | 0.326 | 0.326 | 0.255 | 0.326 | 0.255 | 0.255 | 0.378 | 0.255 | 0.326 | 0.326 | 0.326 | 0.255 | 0.255 | 0.255 | 0.255 | 0.255 | 0.326 | 1.000 |  |  | *O. elata* |
| 0.708 | 0.708 | 1.000 | 1.000 | 0.708 | 1.000 | 0.708 | 0.708 | 0.368 | 0.708 | 1.000 | 1.000 | 1.000 | 0.708 | 0.708 | 0.708 | 0.708 | 0.708 | 1.000 | 0.326 | 1.000 |  | Rossa |
| 0.372 | 0.372 | 0.410 | 0.410 | 0.372 | 0.410 | 0.372 | 0.372 | 0.192 | 0.372 | 0.410 | 0.410 | 0.410 | 0.372 | 0.372 | 0.372 | 0.372 | 0.372 | 0.410 | 0.316 | 0.410 | 1.000 | *O. robusta* |

**Table S3.** Hierarchical analysis of molecular variance (AMOVA) of the *Opuntia* spp. accessions, considering the entire data set clustered in three groups (A, B and C), according to the PCoA clustering. SS = sum of squared deviation; df = degrees of freedom; and P = level of probability of obtaining a more extreme component estimate by chance alone.

| Source of Variation | df | SS | Variance Components | % of Total Variance | P |
| --- | --- | --- | --- | --- | --- |
| Among groups (*Φ*ct = 0.87) | 2 | 1552.696 | 7.85732 | 86.72 | <0.0001 |
| Among populations within groups | 19 | 339,512 | 1,20363 | 13,28 | <0.0001 |
| Within populations | 304 | 0,000 | 0.00000 | 0 | <0.0001 |
| Total | 325 | 1892.208 | 9.06095 |  |  |
